# Supplementary material
Source: Research Square preprint supplement (doi:10.21203/rs.3.rs-9326125/v1)
Supplement: Supplementary file 1 [file 6ae4b8512198888d8c57cf8a.pdf]

## Supplementary Information

Speed Over Strategy: Why Agent Velocity Dominates Aggregation Method in Crowd-Sourced Continuous Control

BongKeun Song — Friedrich-Alexander-Universität Erlangen-Nürnberg (FAU)

### Supplementary Table S1. Optimal speed $v^*$ across adversarial conditions.

Full numerical values of optimal speed  $v^*$  for circle and square trajectories across adversarial ratios. For circular trajectories,  $v^* = 2.03 \pm 0.03$  m/s is effectively constant across all tested conditions (troll-invariant). Square trajectories show  $v^* \leq 1.0$  m/s, reflecting the lower optimal speed required for sharp 90° corners under delayed inputs.

| Trajectory | Troll (%) | $v^*$ (m/s) | $R^2$ | RMSE at $v^*$ |
|------------|-----------|-------------|-------|---------------|
| Circle     | 5         | 2.01        | .993  | 0.241         |
| Circle     | 10        | 2.03        | .988  | 0.244         |
| Circle     | 15        | 2.02        | .985  | 0.247         |
| Circle     | 20        | 2.08        | .977  | 0.249         |
| Circle     | 30        | 2.05        | .969  | 0.258         |
| Circle     | 40        | 2.04        | .962  | 0.263         |
| Square     | all       | $\leq 1.0$  | —     | 0.063–0.102   |

### Supplementary Table S2. Ceiling effect parameters by trajectory (30% adversarial ratio).

Asymptotic fit parameters and ceiling strength classification for four trajectory types at 30% adversarial ratio ( $v = 5.0$  m/s).  $\Delta$ RMSE indicates percentage improvement from  $N=5$  to  $N=200$  participants.  $R^2$  is from fitting  $RMSE(N) = a + b/\sqrt{N}$ . Ceiling strength inversely correlates with trajectory complexity.

| Trajectory | $R^2$ (30% troll) | $\Delta$ RMSE (N=5→200) | Ceiling strength |
|------------|-------------------|-------------------------|------------------|
| Circle     | 0.82              | 28.5%                   | Strong           |
| Square     | 0.86              | 13.4%                   | Strong           |
| Lemniscate | 0.81              | 10.1%                   | Moderate         |
| Zigzag     | 0.14              | 2.6%                    | Weak             |

### Supplementary Table S3. Model comparison: additive vs. multiplicative.

Performance comparison on training and out-of-sample (E5) data. The multiplicative model was selected for superior out-of-sample generalization despite marginally lower training  $R^2$ .

| Metric | Additive | Multiplicative |
|--------|----------|----------------|
|--------|----------|----------------|

|                   |                   |                   |
|-------------------|-------------------|-------------------|
| $R^2$ (full data) | 0.9863            | 0.9844            |
| 5-fold CV $R^2$   | $0.982 \pm 0.010$ | $0.978 \pm 0.010$ |
| E5 mean error     | 8.3%              | 4.6%              |
| E5 within 15%     | 5/6               | 6/6               |
| Parameters        | 4                 | 4                 |

## Supplementary Figure S1. Trajectory-dependent ceiling effect.

Supplementary Figure S1. Trajectory-dependent ceiling effect.

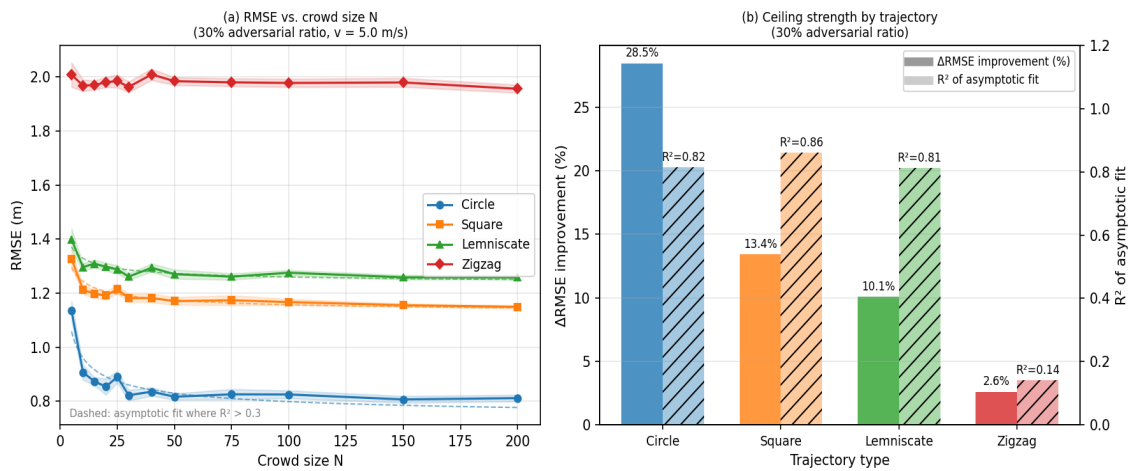

(a) RMSE as a function of crowd size  $N$  for four trajectory types at 30% adversarial ratio ( $v = 5.0$  m/s,  $MC = 15$ ). Solid lines: mean RMSE; shaded regions: 95% CI. Dashed lines: fitted asymptotic models  $RMSE(N) = a + b/\sqrt{N}$  where  $R^2 > 0.3$ . (b) Ceiling strength ( $\Delta$ RMSE from  $N=5$  to  $N=200$ ) and  $R^2$  of asymptotic fit by trajectory. Zigzag shows negligible benefit ( $\Delta$ RMSE = 2.6%,  $R^2 = 0.14$ ), indicating system delay as the binding constraint. Circle and Square show strong ceiling effects ( $\Delta$ RMSE = 28.5% and 13.4%;  $R^2 = 0.82$  and  $0.86$ ).

Simulation code and raw data: <https://github.com/betasbk/Thesis> (Zenodo DOI: 10.5281/zenodo.19413803).
